# Supplementary material
Source: Springer Nature journal article supplement (https://www.springermedizin.de/resource/supplementary/12885_2011_2883_MOESM16_ESM.pdf/9462152)

**A**

| PNP-GDEPT   | - | - | - | - | + | + | + | + |
|-------------|---|---|---|---|---|---|---|---|
| Docetaxel   | - | - | + | + | - | - | + | + |
| Carboplatin | - | + | - | + | - | + | - | + |

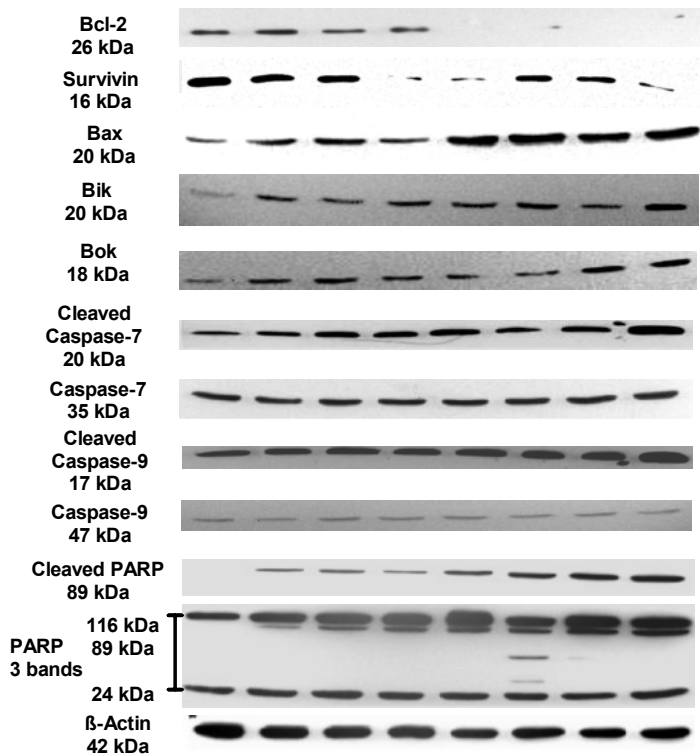**B**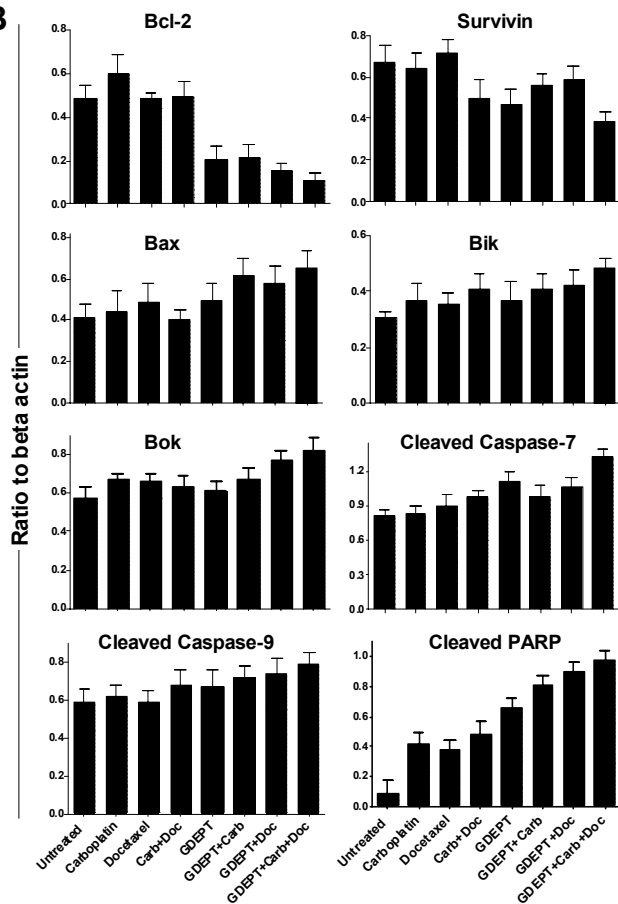

Supplement: MOESM16 [file 9462152]
